# Supplementary material
Source: Springer Nature journal article supplement (https://www.springermedizin.de/resource/supplementary/12889_2005_417_MOESM2_ESM.pdf/9500818)

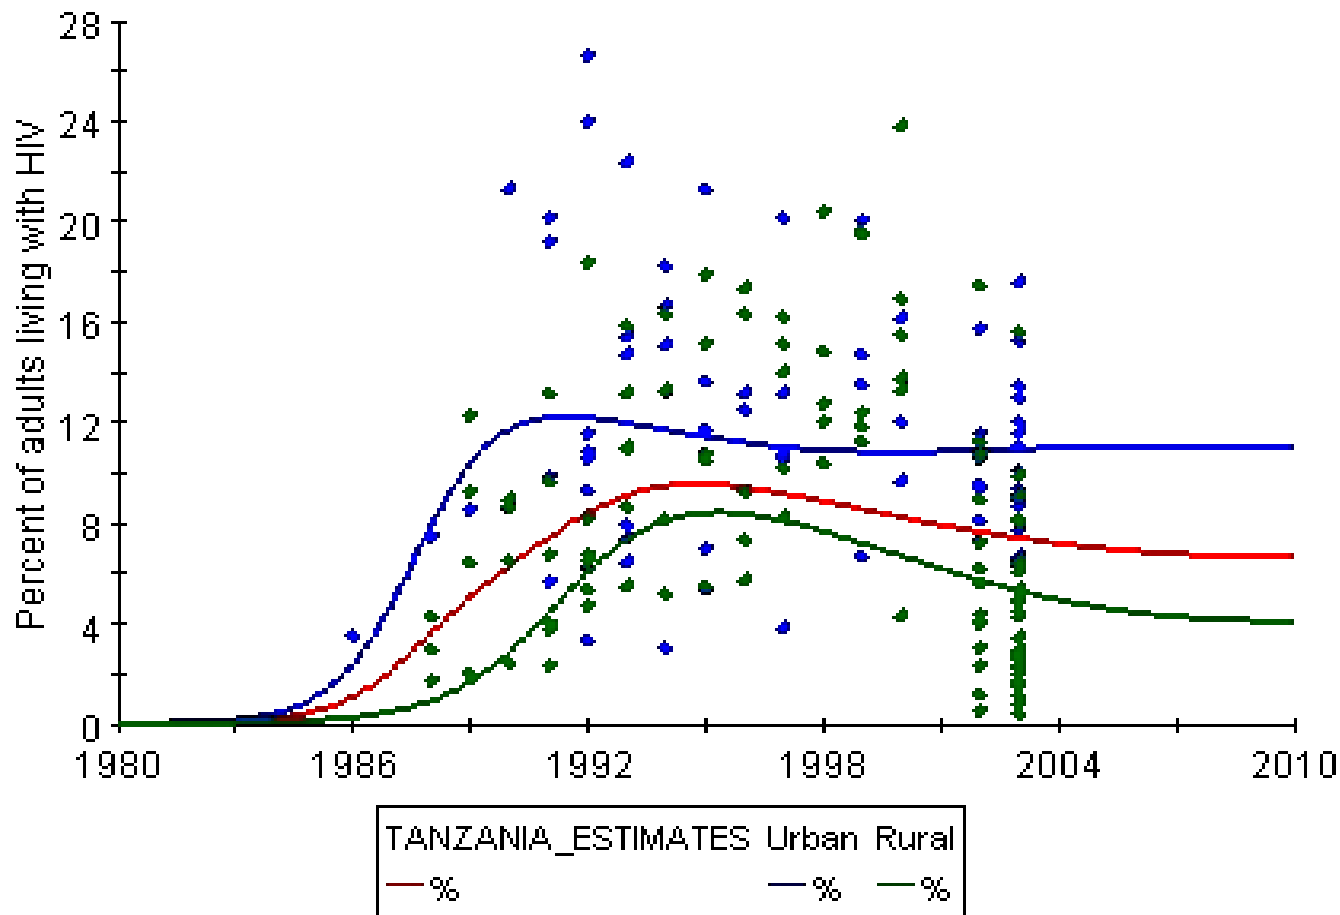

Supplement: MOESM2 [file 9500818]
